# Supplementary material for: Health Impacts and Economic Costs of Air Pollution in the Metropolitan Area of Skopje
Source: MDPI journal article supplement (doi:10.3390/ijerph15040626), 2018-03-29

## **Supplementary material**

Authors: Gerardo Sanchez Martinez, Joseph V. Spadaro, Dimitrios Chapizanis, Vladimir Kendrovski, Mihail Kochubovski and Pierpaolo Mudu

**Manuscript title: Health impacts and economic costs of air pollution in the metropolitan area of Skopje**

**Pages: 2**

**Figures: 3**

**Figure S1 – Time trend of mid-year population stratified by age under current conditions**

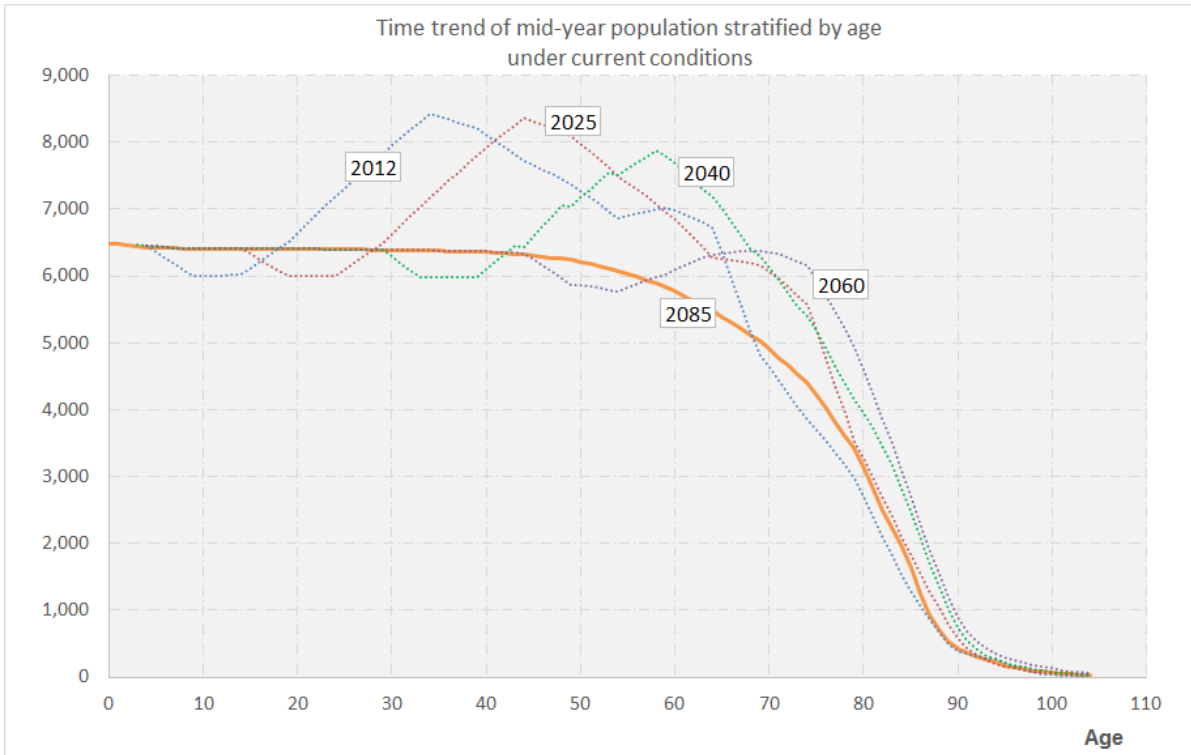

**Figure S2 - Costs of PM<sub>2.5</sub> concentrations and mitigation scenarios for the city of Skopje**

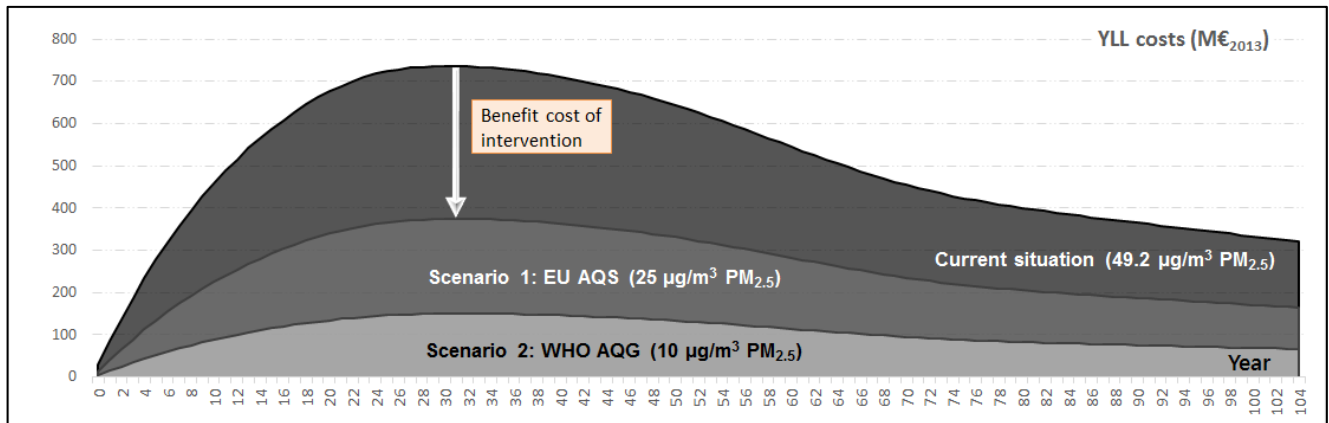

**Figure S3 – Cumulative mortality cost based on YLL for current pollution level**

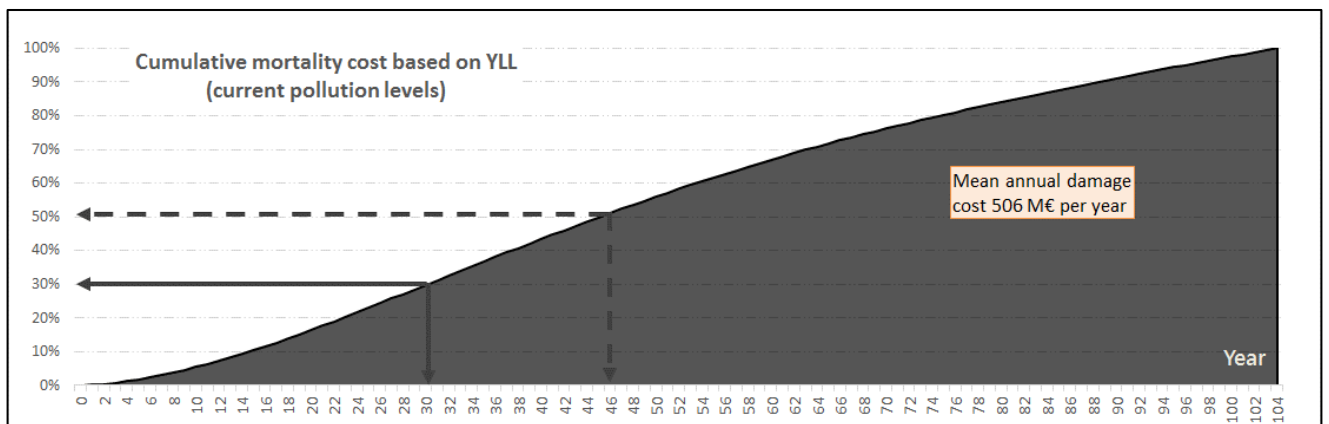

Supplement: s1 [file s1]
